# Supplementary material
Source: PubMed Central journal article supplement (PMC2568918)

## Supplementary Figures

### Mammals reduce methionine-S-sulfoxide with MsrA, are unable to reduce methionine-R-sulfoxide, and this function can be restored with a yeast reductase

Byung Cheon Lee, Dung Tien Le, and Vadim N. Gladyshev

#### Supplementary figure legends

**Figure S1.** HPLC analysis of consumption of Met and Met sulfoxides from growth media. (A) Upper panel shows Met-SO and Met-RO signals in 0.1 mM Met-RSO medium at 0 h and lower panels show changes in Met-SO and Met-RO levels in the same medium after growth of SK-Hep1 cells for 96 h. (B) Upper panel shows Met signal in 0.1 mM Met medium at 0 h and lower panels show change in Met in the same medium after 96 h growth. (C) Upper panel shows Met-SO signal in 0.1 mM Met-SO medium at 0 h and lower panels show change in Met-SO level in the same medium after growing SK-Hep1 cells for 96 h. (D) Upper panel shows Met-RO signal in 0.1 mM Met-RO medium at 0 h and lower panels show change in Met-RO level in the same medium after growing SK-Hep1 cells for 96 h.

**Figure S2.** Multiple sequence alignment of yeast fRMsR and its orthologs in bacteria and eukaryotes. Conserved residues and predicted Cys involved in catalysis are highlighted. Accession numbers: *S. cerevisiae* (NP\_012854), *K. lactis* (XP\_456263), *C. glabrata* (XP\_446236), *A. oryzae* (BAE62132), *N. aromaticivorans* DSM 12444 (YP\_495413), *I. baltica* OS145 (ZP\_01043850), *E. coli* F11 (ZP\_00723710).

**Figure S3.** Growth of SK-Hep1 cells in selenium-deficient media. (A and B) Cells were grown in Met-free medium supplemented with Met (diamonds), Met-RO (circles), Met-SO (triangles), Met-RSO (squares) (0.1 mM of each amino acid), or with no addition of these compounds (stars) for 0, 24, 48, or 72 h. FBS and insulin/transferrin media supplemented with Met or Met sulfoxides were also used. (A) 100 nM Se was added to each medium. (B) No Se was added. (C) The following cell growth conditions were examined: 10% FBS and 0.1 mM Met (closed diamonds); 10% FBS, 0.1 mM Met, and 100 nM Se (open diamonds); insulin, transferrin, and 0.1 mM Met (closed squares); insulin, transferrin, 0.1 mM Met, and 100 nM Se (open squares); insulin, transferrin, and 0.1 mM Met-RSO (closed triangles); and insulin, transferrin, 0.1 mM Met-RSO, and 100 nM Se (open triangles). Error bars represent standard deviations from 3 independent experiments.

**Figure S4.** HPLC analysis of Met-SO and Met-RO in mouse plasma. Met-SO and Met-RO were examined by an HPLC assay in plasma from (A) wild type, (B) heterozygous MsrA knockout, (C) homozygous MsrA knockout, and (D) selenium-deficient (SD) mice. Elution of sulfoxides is indicated by arrows.

**Figure S1**

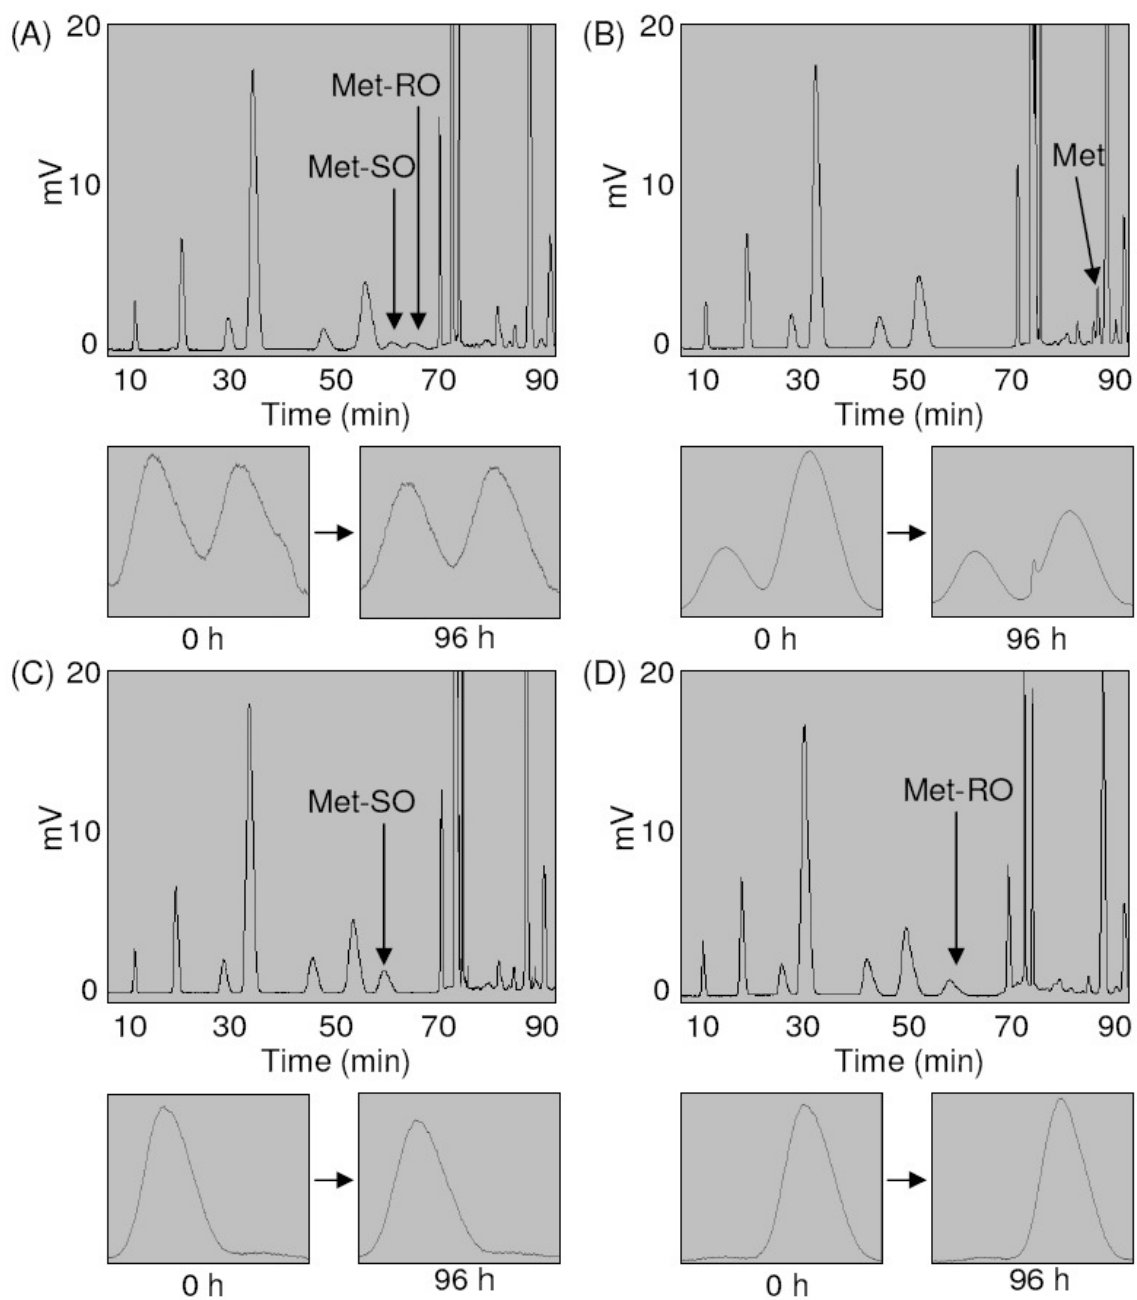

Figure S2

```

K.lactis      1  MGEDG-KH-----HADYSSFQT-
C.glabrata   1  MSE---KH-----HADYTNFNA-
S.cerevisiae  1  MGSSTGFH-----HADHVNYSSN
A.oryzae     1  MHNTYPKHNLTYLTQYQFFCI IATFFNLITIPPIHYSPTS LQKPYQITTMFHADSSYFGEN
I.baltica    1  -----
E.coli       1  -----
N.aromaticivorans 1  -----MFTFAPTEG-
  
```

```

K.lactis      17  TDRKKALEQLLISYEALAEQDNWVC-NLANAASLIWHCYISLN---VDNWAGFYLTR-
C.glabrata   15  TDRSEALQLLIDSYEALAMDQRNWVC-NLANAASLLWHAYKSLN---VNVNWTGFYIRN-
S.cerevisiae  19  LNKEEILEQLLLSYEGLSDGOVNWVC-NLSNASSLIWHAYKSLA---VDINWAGFYVTQ-
A.oryzae     61  ASKSDIYTOVLEQAQGLVYGQRNWVCSNF SNVASLLWHAYAAALPSPSSVNWAGFYIRQD
I.baltica    1  MQVVSVRDDIVTQCEATTSGESDLIA-NLANISALIFDQFE-----DINWAGFYLTR-
E.coli       1  MNKAEEFYADLNRDFNALMAGETSEFLA-TLANTSALLYERLT-----DINWAGFYLL-
N.aromaticivorans 10 HSR AELHADLLEAARALTDGEPDQVA-NMANVAALIWQFLP-----DINWAGFYRMV-
  
```

```

K.lactis      72  -----RENKKEILGLPFQGVACQLIQFGKGVCGTAASSQCTQLVDPDVENFPG
C.glabrata   70  -----GE-KEQLLGLPFQGVACQITIDFGRGVCGIAASSQETQLVDPDVKFPG
S.cerevisiae  74  -----ASEENTLILGLPFQGVACOMIQFGKGVCGTAASITKETQIVPDVNKYPG
A.oryzae     121 KFPNAQTTEKQONQKQVWLGLPFQGRFACQEIFRFGKGVCGTAAEKREIVLVGDVLSFPG
I.baltica    52  -----GERELVGLPFQGVACVRIPFGQGVCGVAADSCALOHVHVDVHEFSG
E.coli       52  -----DDT-LVLGPFQGKIACVRIPVGRGVCGTAVARNQVQRTEVDVHAFDG
N.aromaticivorans 61 -----EGE-LVLGPFVGRFACIRIPLGKGVCGTAAASGETQLVADVHAFPG
  
```

```

K.lactis      120 HIACDGETKSEIVVPIV-QNGETVGVVIDIDCLDYNGFTKLD----QEFLEKLAASVSKTC
C.glabrat    117 HIACDGETKSEIVVPIVSQSGKTLGVIDLCLDFEGFTDVD----KEYLEKLALAITKSC
S.cerevisiae  122 HIACDGETKSEIVVPIISNDGKTLGVIDIDCLDYEGFDHVD----KEFLEKLAKLINKSC
A.oryzae     181 HIACDASSRSEIVVPIL-VGGETVAIIDIDCTEPDGFDEVD----RKYLEDLAKLLAEAC
I.baltica    98  HIACDAASNAEVVPAPII-VDGKTVGVLDIDSPVGRFSAED----AEMFARIAAICATFN
E.coli       97  HIACDAASNSEIVLPLV-VKNQIIGVLDIDSTVFRGFTDEDEQGLRQLVAOLEKVLATTD
N.aromaticivorans106 HIACDAASRSELVVPVL-RDGGVIAVIDLIDSPSPSRFDEED----ARGLEALARAMAHRI
  
```

```

K.lactis      175  VF-----
C.glabrata   173  DF-----
S.cerevisiae  178  VFK-----
A.oryzae     236  DW-----
I.baltica    153  WNQA-----
E.coli       156  YKKFFASVAG
N.aromaticivorans161 -----
  
```

Figure S3

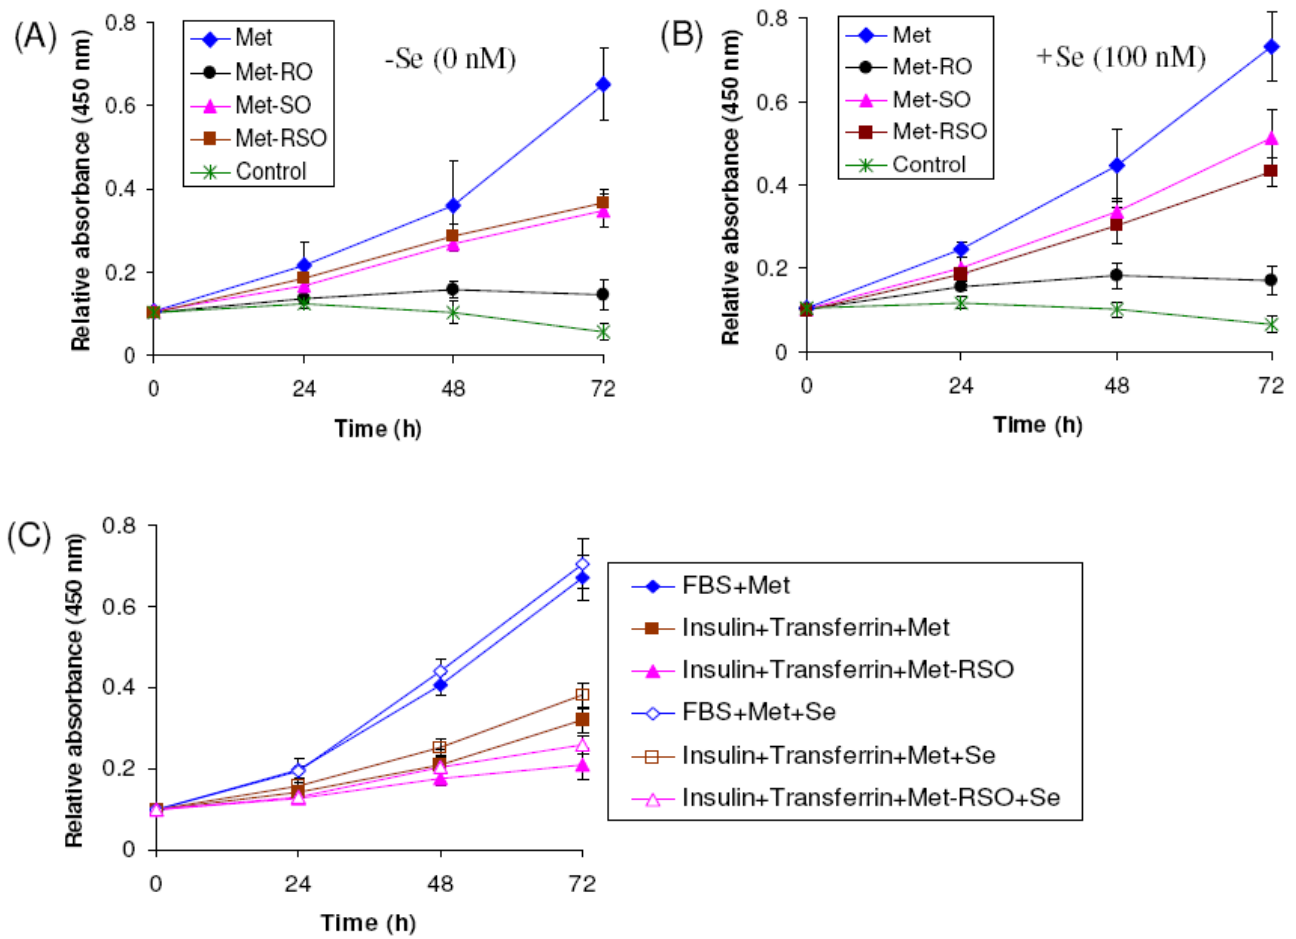

**Figure S4**

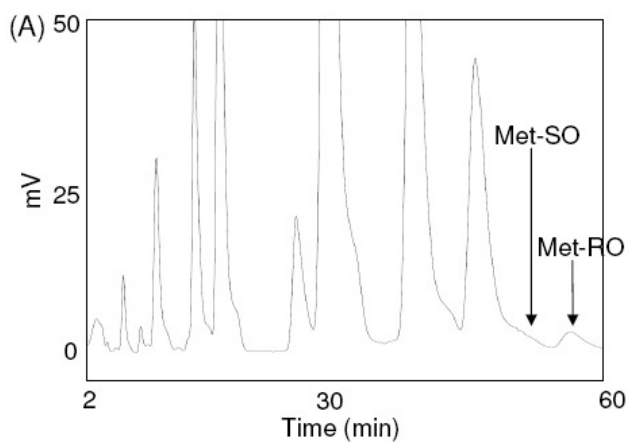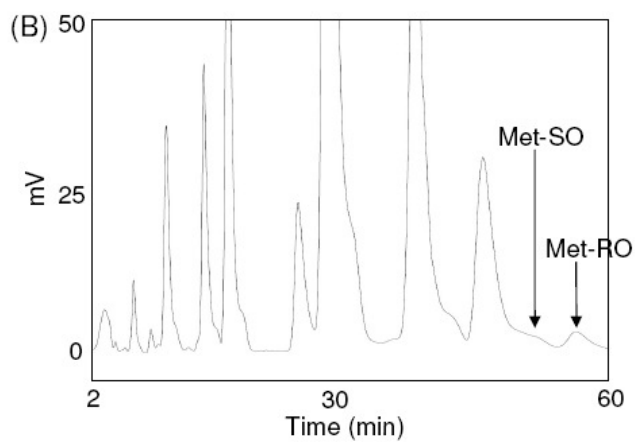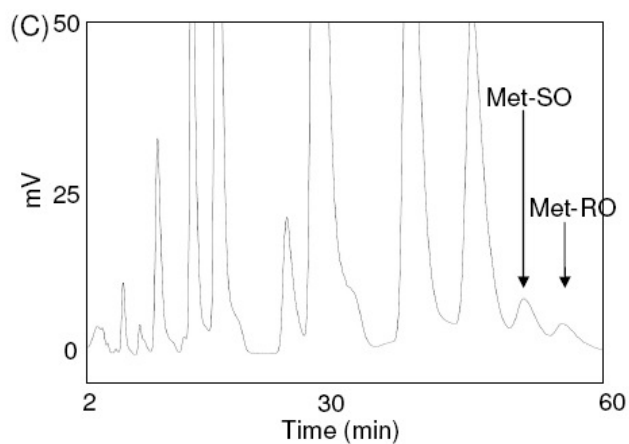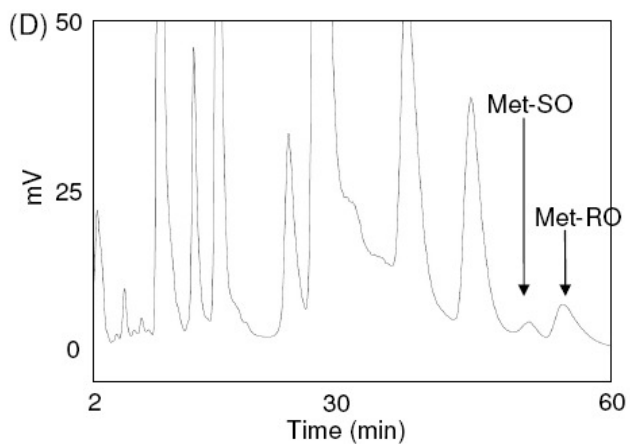

Supplement: M805059200_1.pdf [file M805059200_1.pdf]
